# Supplementary material for: Organic aerosols mixing across the tropopause and its implication for anthropogenic pollution of the UTLS
Source: Copernicus journal article supplement (doi:10.5194/egusphere-2025-3129), 2025-07-10
Supplement: Supplementary file 1 [file egusphere-2025-3129-supplement.pdf]

S1 Sample details

Table S1. Details on the sampling period, height range and covered area.

| Sample                   | Date         | Sampling Time / UTC    | Altitude Range / m |
|--------------------------|--------------|------------------------|--------------------|
| F05 - The Fold           |              |                        |                    |
| Filter 1                 | 13 June 2024 | 10:28 - 11:31, 63 min  | 5744 - 6751        |
| Filter 2                 | 13 June 2024 | 11:31 - 12:36, 65 min  | 6699 - 9754        |
| Filter 3                 | 13 June 2024 | 12:36 - 13:24, 48 min  | 9675 - 10397       |
| Filter 4                 | 13 June 2024 | 13:24 - 14:02, 48 min  | 8353 - 10305       |
| Filter 5                 | 13 June 2024 | Blank                  |                    |
| F09 - Convection Hunting |              |                        |                    |
| Filter 1                 | 18 June 2024 | 13:10 - 13:25, 15 min  | 9690 - 10058       |
| Filter 2                 | 18 June 2024 | 13:36 - 14:04, 28 min  | 995 - 1040         |
| Filter 3                 | 18 June 2024 | 14:16 - 16:02, 106 min | 8234 - 11944       |
| Filter 4                 | 18 June 2024 | 16:02 - 16:19, 17 min  | 11858 - 11942      |
| Filter 5                 | 18 June 2024 | Blank                  |                    |

## S2 Technical drawings of SOAP

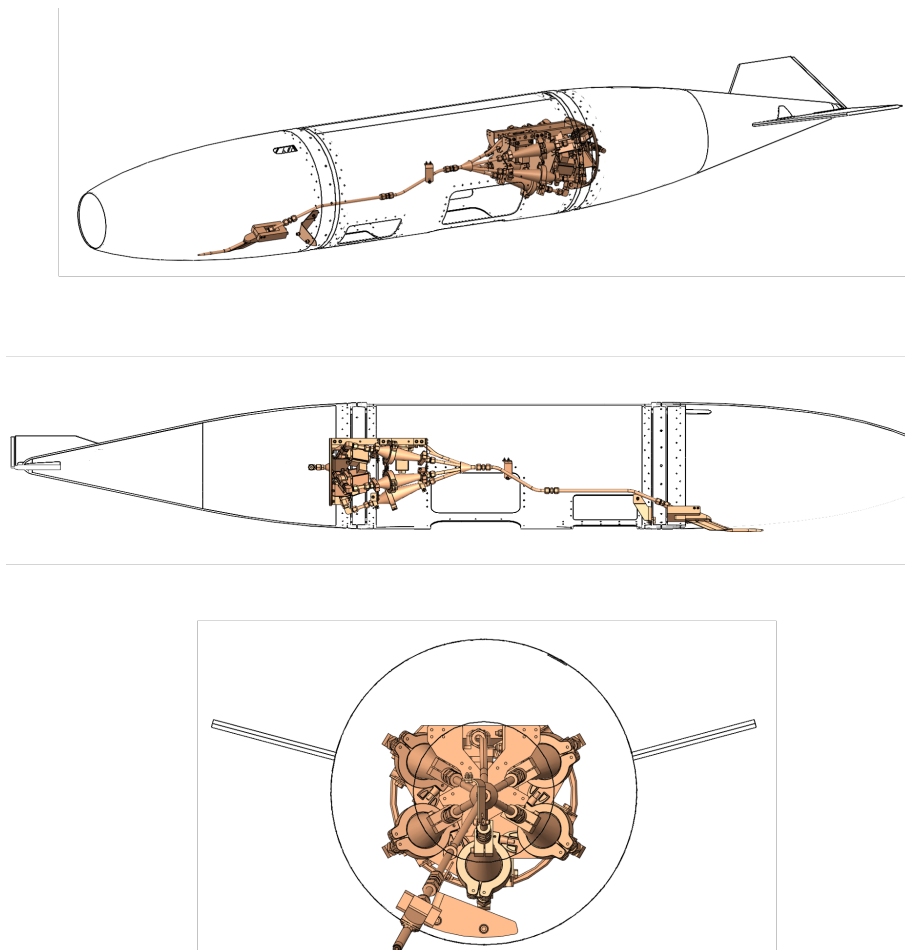

**Figure S1.** Technical drawings that show the sampler for organic aerosol particles SOAP (orange) in the wingpod KNUFFI. Perspectives are from the side (top and middle) and from the front (bottom).

S3 Estimations on particle loss

S3.1 Particle loss for F05

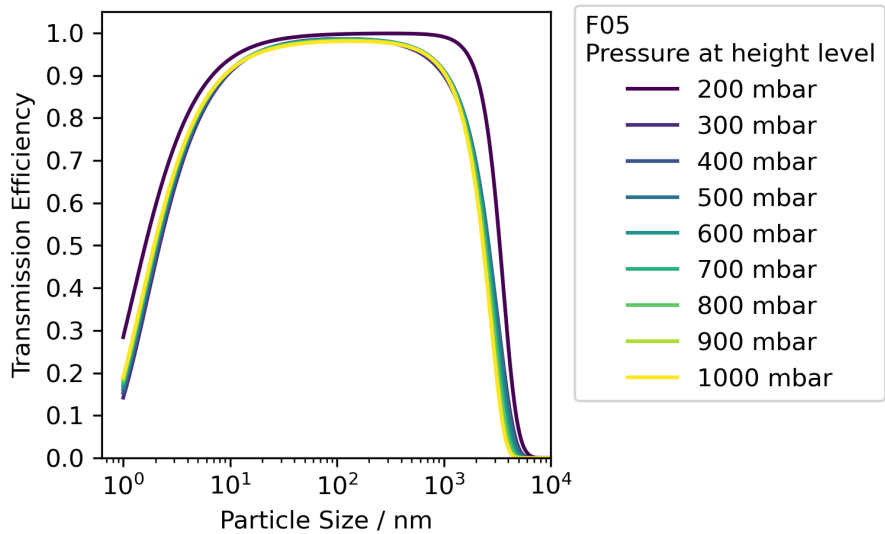

**Figure S2.** Calculated transmission efficiency for particle sizes from 1 to 10000 nm. The transmission efficiency is calculated for different height levels (200-1000 mbar), covering the whole flight path of F05.

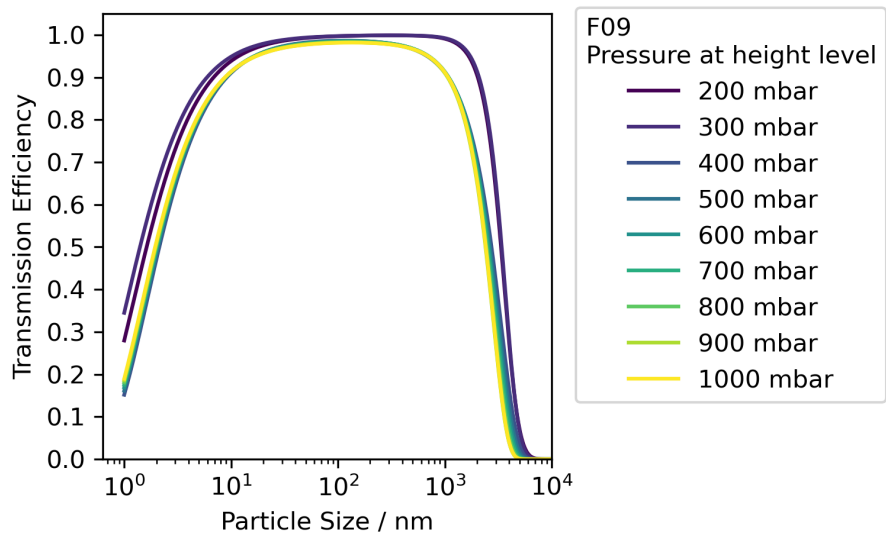

**Figure S3.** Calculated transmission efficiency for particle sizes from 1 to 10000 nm. The transmission efficiency is calculated for different height levels (200-1000 mbar), covering the whole flight path of F09.



## S4 Method overview

### S4.1 UHPLC-HRMS method

**Table S2.** Overview of the set parameters of the UHPLC-HRMS method used.

|                        |                              |
|------------------------|------------------------------|
| <b>Sampler Modus</b>   |                              |
| Puncture Offset        | 2 $\mu\text{m}$              |
| Wash Speed             | 20.0 [ $\mu\text{L/s}$ ]     |
| Injection Wash Mode    | Both                         |
| Wash Time              | 5.0 [s]                      |
| Dispense Speed         | 5.000 [ $\mu\text{L/s}$ ]    |
| Draw Speed             | 5.000 [ $\mu\text{L/s}$ ]    |
| Temperature Control    | On                           |
| Temperature Nominal    | 15.0 [ $^{\circ}\text{C}$ ]  |
| <b>Post Column</b>     |                              |
| Delta Temperature      | 1.00 [ $^{\circ}\text{C}$ ]  |
| Temperature Control    | On                           |
| Temperature Nominal    | 40.0 [ $^{\circ}\text{C}$ ]  |
| Equilibration Time     | 1.0 [min]                    |
| <b>Column</b>          |                              |
| Mode                   |                              |
| Delta Temperature      | 0.50 [ $^{\circ}\text{C}$ ]  |
| Temperature Control    | On                           |
| Temperature Nominal    | 40.00 [ $^{\circ}\text{C}$ ] |
| Equilibration Time     | 1.0 [min]                    |
| <b>Pump</b>            |                              |
| Pressure lower limit   | 0 [bar]                      |
| Pressure upper limit   | 737 [bar]                    |
| Maximum Flow Ramp Up   | 6.00 [ $\text{mL/min}^2$ ]   |
| Maximum Flow Ramp Down | 6.00 [ $\text{mL/min}^2$ ]   |
| <b>Method</b>          |                              |
| Pump Flow Nominal      | 0.400 [ $\text{mL/min}$ ]    |
| 0.000 min              | 1.0 [%] B1                   |
| 1.000 min              | 1.0 [%] B1                   |
| 19.000 min             | 99.0 [%] B1                  |
| 21.000 min             | 99.0 [%] B1                  |
| 22.000 min             | 1.0 [%] B1                   |
| 25.000 min             | Stop Run                     |

| Overall method settings                           |                       |
|---------------------------------------------------|-----------------------|
| Method duration                                   | 25.00 min             |
| Chrom. Peak width                                 | 6 s                   |
| Experiment                                        |                       |
| Full MS                                           |                       |
| Polarity                                          | negative and positive |
| dd-MS2                                            | Discovery             |
| Resolution                                        | 70,000                |
| #Scan ranges                                      | 1                     |
| Scan Range                                        | 50 to 750 $m/z$       |
| AGC Target                                        | 1e6                   |
| Maximum IT                                        | auto                  |
| Microscans                                        | 1                     |
| Spectrum data type                                | Profile               |
| dd-MS2 Discovery                                  |                       |
| Resolution                                        | 17,500                |
| Isolation window                                  | 3.0 $m/z$             |
| (N)CE / Stepped (N)CE                             |                       |
| Default charge state                              | ce: 15,30,45          |
| AGC Target                                        | 1e5                   |
| Maximum IT                                        | auto                  |
| Loop count                                        | 1                     |
| Minimum AGC Target                                | 5e4                   |
| Intensity Threshold                               | auto                  |
| Apex trigger                                      | 0.5 to 3 s            |
| Dynamic exclusion                                 | auto                  |
| Exclude isotopes                                  | on                    |
| Spectrum data type                                | Profile               |
| Setup                                             |                       |
| Lock Masses                                       |                       |
| 112.98562 (Formic Acid dimer w Na)                | negative              |
| 100.07569 (N-Methyl-2pyrrolidone, floor stripper) | positive              |

## S4.2 Compound Discoverer workflow - negative mode or positive mode

Created with Discoverer version: 3.3.2.31

10

Input Files (0)  
 ->Select Spectra (2)

15 Select Spectra (2)  
 ->Align Retention Times (ChromAlign) (23)

Align Retention Times (ChromAlign) (23)  
 ->Detect Compounds (21)

20 Detect Compounds (21)  
 ->Group Compounds (4)

- Group Compounds (4)
- Fill Gaps (17)
- 25 →Assign Compound Annotations (11)
- Compound Class Scoring (35)
- Calculate Mass Defect (37)
- Search mzCloud (31)
- Search mzVault (32)
- 30 →Predict Compositions (5)

- Fill Gaps (17)
  - Mark Background Compounds (18)
  - Mark Background Compounds (18)
  - 35 Assign Compound Annotations (11)
  - Compound Class Scoring (35)
  - Calculate Mass Defect (37)
  - Search mzCloud (31)
  - Search mzVault (32)
  - 40 Predict Compositions (5)
  - Descriptive Statistics (24)
  - Differential Analysis (25)
- 

#### 45 Processing node 0: Input Files

---

- Processing node 2: Select Spectra
1. Spectrum Properties Filter:
- 50 - Lower RT Limit: 1.7
  - Upper RT Limit: 22
  - First Scan: 0
  - Last Scan: 0
  - Ignore Specified Scans: (not specified)
  - 55 - Lowest Charge State: 0
  - Highest Charge State: 0
  - Min. Precursor Mass: 50 Da
  - Max. Precursor Mass: 5000 Da
  - Total Intensity Threshold: 1000
  - 60 - Minimum Peak Count: 1

2. Scan Event Filters:
- Mass Analyzer: Is FTMS
  - MS Order: Any
  - 65 - Activation Type: Is HCD
  - Min. Collision Energy: 0
  - Max. Collision Energy: 1000
  - Scan Type: Any
  - Polarity Mode: Is - (or +)
  - 70 - MS1 Mass Range: (not specified)
  - FAIMS CV: (not specified)

3. Peak Filters:
- S/N Threshold (FT-only): 5
  - 75

4. Replacements for Unrecognized Properties:
- Unrecognized Charge Replacements: 1
  - Unrecognized Mass Analyzer Replacements: ITMS
  - Unrecognized MS Order Replacements: MS2
  - 80 - Unrecognized Activation Type Replacements: HCD
  - Unrecognized Polarity Replacements: -
  - Unrecognized MS Resolution@200 Replacements: 60000
  - Unrecognized MSn Resolution@200 Replacements: 30000

- 85 5. General Settings:
- Precursor Selection: Use MS1 Precursor
  - Use Isotope Pattern in Precursor Reevaluation: True
  - Provide Profile Spectra: Automatic
  - Store Chromatograms: False

90

---

Processing node 23: Align Retention Times (ChromAlign)

---

- 95 Processing node 21: Detect Compounds

1. General Settings:

- Mass Tolerance (ppm): 5 ppm
- Min. Peak Intensity: 100000
- Min. # Scans per Peak: 5
- 100 - Use Most Intense Isotope Only: True

2. Trace Detection:

- Max. Number of Gaps to Correct: 2
- Min. Number of Adjacent Non-Zeros: 2

105

3. Peak Detection:

- Chromatographic S/N Threshold: 5
- Remove Baseline: False
- Gap Ratio Threshold: 0.35
- 110 - Max. Peak Width (min): 0.2
- Min. Relative Valley Depth: 0.2

4. Isotope Pattern Detection:

- Group Isotopes for: Br; Cl
- 115 - Use Peak Quality for Isotope Grouping: True
- Filter out Features with Bad Peaks Only: True
- Zig-Zag Index Threshold: 0.2
- Jaggedness Threshold: 0.4
- Modality Threshold: 0.9
- 120 - Remove Potentially False Positive Isotopes: True

5. Compound Detection:

- Ions: [2M-H]-1; [M-CO2-H]-1; [M-H]-1; [M-H-H2O]-1 or [M+H]+1; [M+K]+1; [M+Na]+1; [M+NH4]+1
- Base Ions: [M-H]-1 or [M+H]+1
- 125 - Remove Singlets: True

6. AcquireX Settings:  
- Detect Persistent Background Ions: False

---

130 Processing node 4: Group Compounds  
1. General Settings:  
- Mass Tolerance: 2 ppm  
- RT Tolerance [min]: 0.2  
135 - Align Peaks: False  
- Preferred Ions: [M-H]-1 or [M+H]+1  
- Area Integration: Most Common Ion

2. Peak Rating Contributions:  
140 - Area Contribution: 3  
- CV Contribution: 0  
- FWHM to Base Contribution: 5  
- Jaggedness Contribution: 5  
- Modality Contribution: 5  
145 - Zig-Zag Index Contribution: 5

3. Peak Rating Filter:  
- Peak Rating Threshold: 5  
- Number of Files: 2

---

150 Processing node 17: Fill Gaps  
1. General Settings:  
- Mass Tolerance: 2 ppm  
155 - S/N Threshold: 5  
- Use Real Peak Detection: True  
- Apply Restrictive Gap Filling: True

---

160 Processing node 18: Mark Background Compounds  
1. General Settings:  
- Max. Sample/Blank: 5  
- Max. Blank/Sample: 0  
- Hide Background: True  
165

---

Processing node 11: Assign Compound Annotations  
1. General Settings:  
- Mass Tolerance: 2 ppm  
170

2. Data Sources: - Data Source #1: Predicted Compositions  
- Data Source #2: mzVault Search  
- Data Source #3: mzCloud Search (Compound Class)

175 3. Scoring Rules:  
- Use mzLogic: True  
- Use Spectral Distance: True  
- SFit Threshold: 20

180     - SFit Range: 20

          4. Reprocessing:

          - Clear Names: True

---

185     Processing node 35: Compound Class Scoring

          1. General Settings:

          - Compound Classes: R-OSO3, R-SO3.cLib|R-NO3.cLib

          - S/N Threshold: 50

          - High Acc. Mass Tolerance: 15 ppm

190     - Low Acc. Mass Tolerance: 0.5 Da

          - Use Full MS Tree: True

          - Allow DIA Scoring: True

---

195     Processing node 37: Calculate Mass Defect

          1. Mass Defect:

          - Fractional Mass: False

          - Standard Mass Defect: True

          - Relative Mass Defect: False

200     - Kendrick Mass Defect: True

          - Nominal Mass Rounding: Round

          2. Kendrick Formula:

          - Formula 1: C H2

---

205     Processing node 31: Search mzCloud

          1. General Settings:

          - Compound Classes: All

          - Precursor Mass Tolerance: 10 ppm

210     - FT Fragment Mass Tolerance: 10 ppm

          - IT Fragment Mass Tolerance: 0.4 Da

          - Library: Autoprocessed; Reference

          - Post Processing: Recalibrated

          - Max. # Results: 10

215     - Annotate Matching Fragments: True

          - Search MSn Tree: False

          2. DDA Search:

          - Identity Search: HighChem HighRes

220     - Match Activation Type: True

          - Match Activation Energy: Match with Tolerance

          - Activation Energy Tolerance: 20

          - Apply Intensity Threshold: True

          - Similarity Search: None

225     - Match Factor Threshold: 60

          3. DIA Search:

          - Use DIA Scans for Search: False

          - Max. Isolation Width [Da]: 500

230     - Match Activation Type: False

          - Match Activation Energy: Any

- Activation Energy Tolerance: 100
- Apply Intensity Threshold: False
- Match Factor Threshold: 20

235

---

Processing node 32: Search mzVault

1. Search Settings:

- mzVault Library: AP\_O3\_rA\_MW\_neg.dbl AP\_O3\_UV\_rA\_MW\_neg.dbl
- 240 BCY\_O3\_rA\_MW\_neg.dbl
- BCY\_O3\_UV\_rA\_MW\_neg.dbl BP\_O3\_rA\_MW\_neg.dbl BP\_O3\_UV\_rA\_MW\_neg.dbl
- D3C\_O3\_rA\_MW\_neg.dbl D3C\_O3\_UV\_rA\_MW\_neg.dbl LIM\_O3\_rA\_MW\_neg.dbl
- LIM\_O3\_UV\_rA\_MW\_neg.dbl NAP\_O3\_UV\_rA\_MW\_neg.dbl
- TMB\_O3\_UV\_rA\_MW\_neg.dbl
- 245 TOL\_O3\_UV\_rA\_MW\_neg.dbl XYL\_O3\_UV\_rA\_MW\_neg.db
- Max. # Results: 10
- Match Factor Threshold: 80
- Search Algorithm: HighChem HighRes
- Match Analyzer Type: True
- 250 - IT Fragment Mass Tolerance: 0.4 Da
- FT Fragment Mass Tolerance: 10 ppm
- Use Retention Time: True
- Precursor Mass Tolerance: 10 ppm
- Apply Intensity Threshold: True
- 255 - Match Ionization Method: True
- Ion Activation Energy Tolerance: 20
- Match Ion Activation Energy: Match with Tolerance
- Match Ion Activation Type: True
- Compound Classes: All
- 260 - Remove Precursor Ion: True
- RT Tolerance [min]: 1

---

Processing node 5: Predict Compositions

265 1. Prediction Settings:

- Mass Tolerance: 2 ppm
- Min. Element Counts: C H
- Max. Element Counts: C90 H190 Br4 Cl4 N6 O20 P S6
- Min. RDBE: 0
- 270 - Max. RDBE: 40
- Min. H/C: 0.1
- Max. H/C: 3.5
- Max. # Candidates: 10
- Max. # Internal Candidates: 200

275

2. Pattern Matching:

- Intensity Tolerance [%]: 30
- Intensity Threshold [%]: 0.1
- S/N Threshold: 5
- 280 - Min. Spectral Fit [%]: 30
- Min. Pattern Cov. [%]: 90
- Use Dynamic Recalibration: True

285     3. Fragments Matching:  
      - Use Fragments Matching: True  
      - Mass Tolerance: 2 ppm  
      - S/N Threshold: 5

---

290     Processing node 24: Descriptive Statistics  
      No parameters

---

295     Processing node 25: Differential Analysis  
      1. General Settings:  
      - Log10 Transform Values: True

300         2. Peak Rating Contributions:  
      - Update Peak Rating: True  
      - Area Contribution: 3  
      - CV Contribution: 0  
      - FWHM to Base Contribution: 5  
      - Jaggedness Contribution: 5  
      - Modality Contribution: 5

305       - Zig-Zag Index Contribution: 5



## S5 AMS and UHSAS measurements

### S5.1 AMS measurements for F09

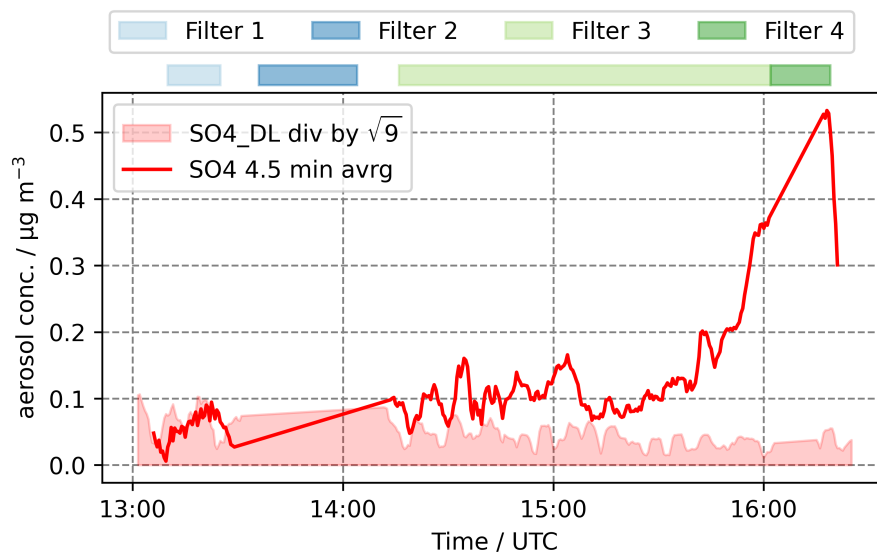

**Figure S4.** Displayed in red is the aerosol concentration of  $\text{SO}_4^{2-}$  in  $\mu\text{g m}^{-3}$  for the flight F09. The data points are averaged to 4.5 min (9 data points, one data point each 30 sec) and thus the detection limit is divided by  $\sqrt{9}$ . Additionally, the filter sampling periods are displayed in the respective colors light blue: filter 1, blue: filter 2, light green: filter 3 and green: filter 4.

## S5.2 AMS measurements for F05

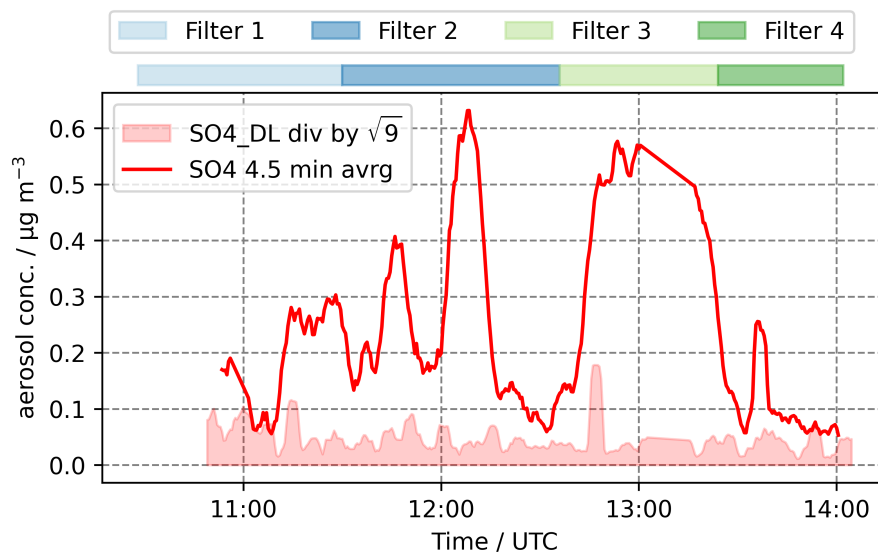

**Figure S5.** Displayed in red is the aerosol concentration of  $\text{SO}_4^{2-}$  in  $\mu\text{g m}^{-3}$  for the flight F05. The data points are averaged to 4.5 min (9 data points, one data point each 30 sec) and thus the detection limit is divided by  $\sqrt{9}$ . Additionally, the filter sampling periods are displayed in the respective colors light blue: filter 1, blue: filter 2, light green: filter 3 and green: filter 4.

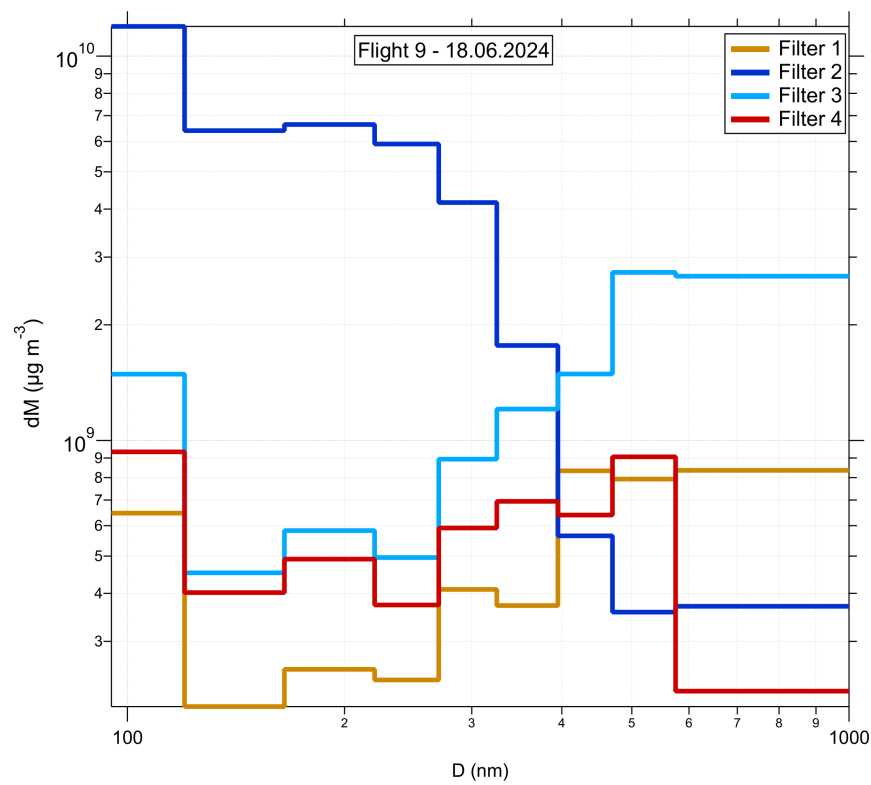

**Figure S6.** Size distribution from 100 to 1000 nm for filter 1 to 4 of flight F09 - 18 June 2024, averaged based on the filter collection time.

## S6 Five-day backward trajectories for F05 and F09

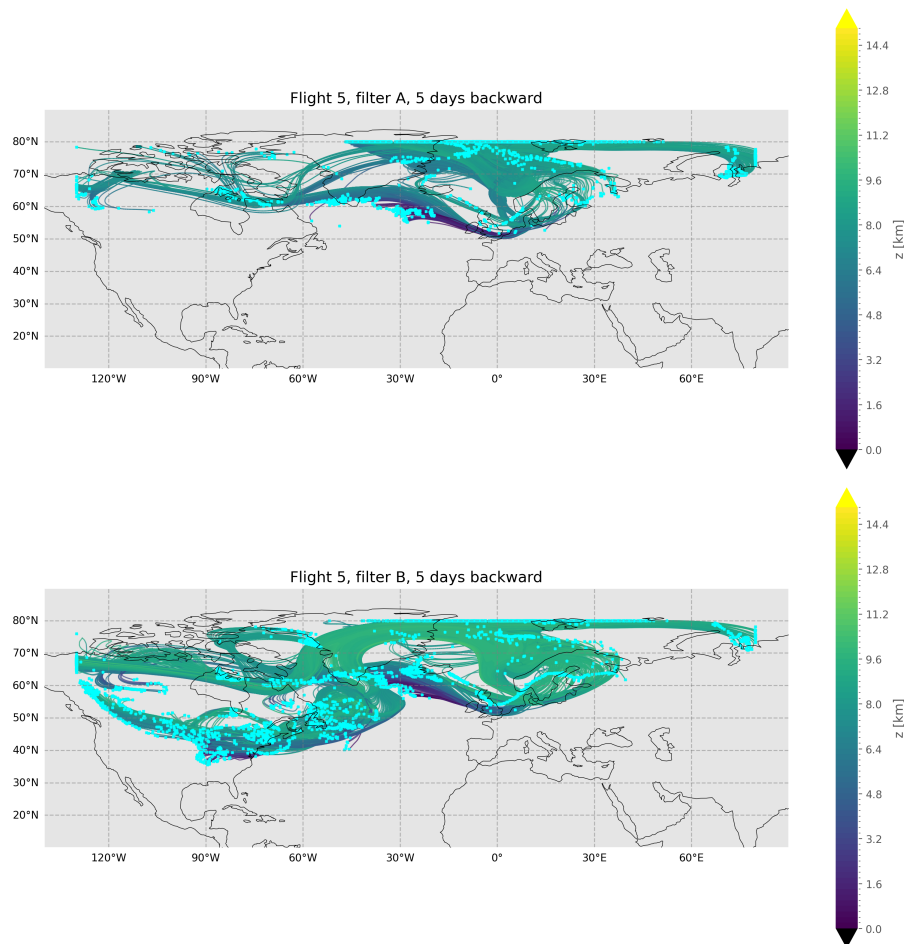

**Figure S7.** Five-day backward trajectories of the sampled period for F05: filter 1 (A, top) and 2 (B, bottom). The altitude of the air mass is displayed by the color in km. The origin of the respective air mass is marked by a blue dot.

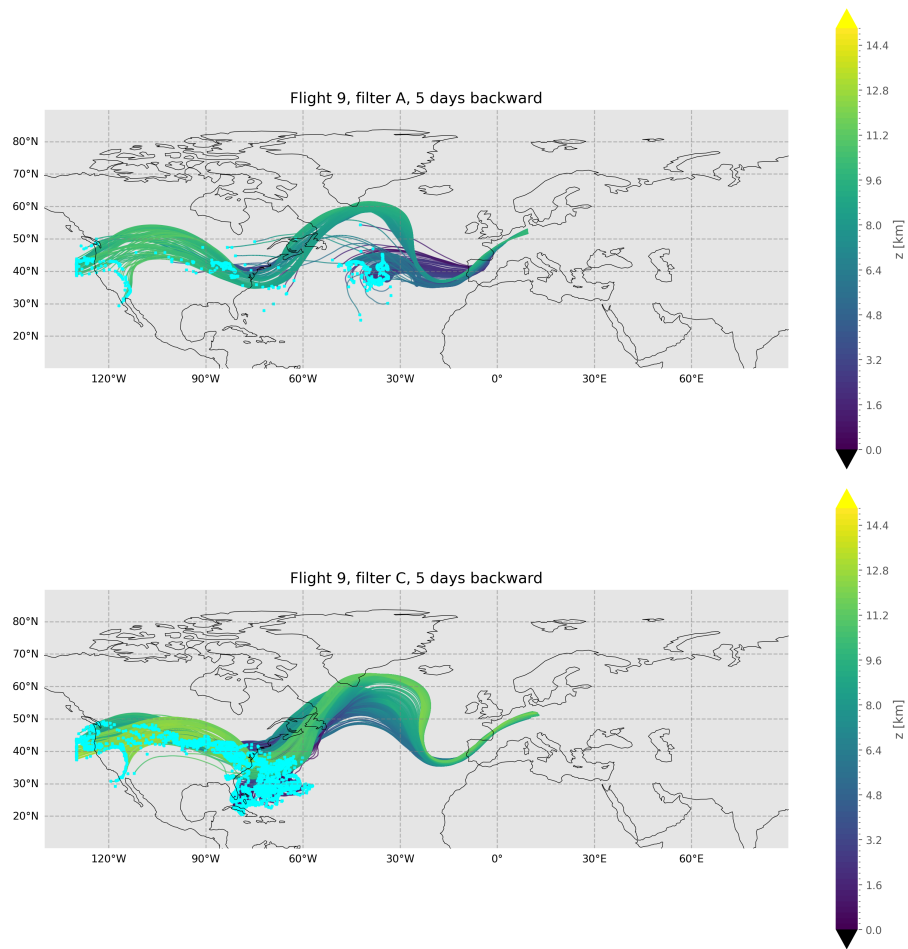

**Figure S8.** Five-day backward trajectories of the sampled period for F09: filter 1 (A, top) and 3 (C, bottom). The altitude of the air mass is displayed by the color in km. The origin of the respective air mass is marked by a blue dot.

## S7 Additional information from trajectories on vertical lifting prior to observations

### S7.1 Trajectories for F05

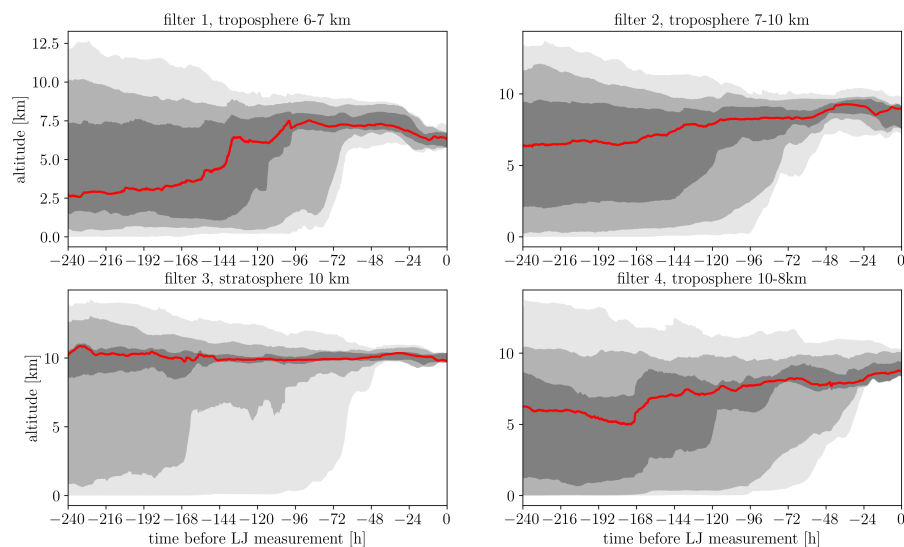

**Figure S9.** Evolution of parcel altitude in the 240 h prior to the Learjet observations of F05. The median altitude is shown by the red line, the interquartile range by the dark grey shading, the 5th–95th percentile range by the medium grey shading and the the minimum-maximum range by the light grey shading.

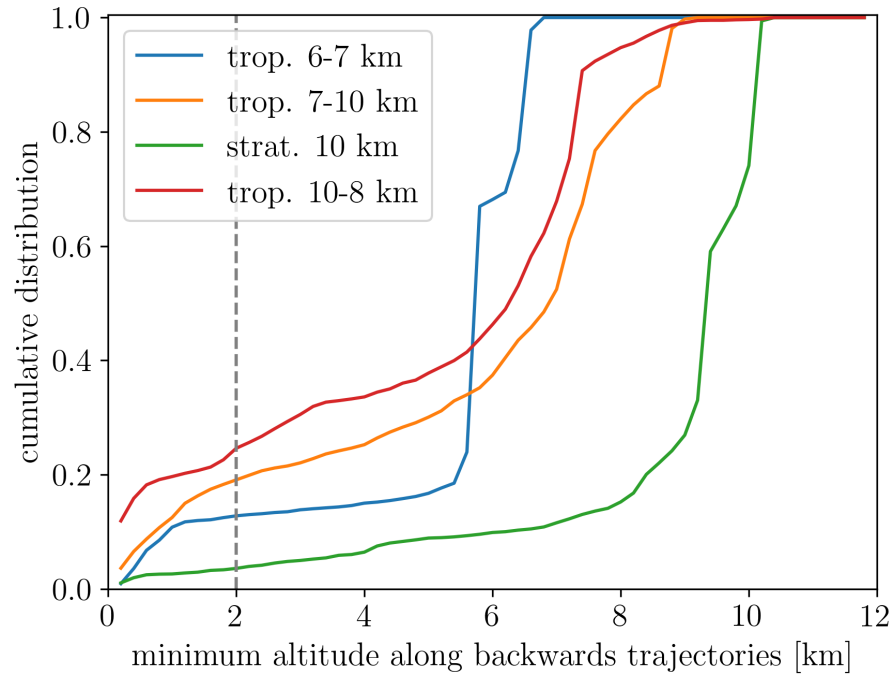

**Figure S10.** Fraction of trajectory that descend below a given altitude in the 240 h prior to the Learjet observations of F05. The different colors represent the different time ranges along the flight path sampled by the different filters as indicated in the legend.

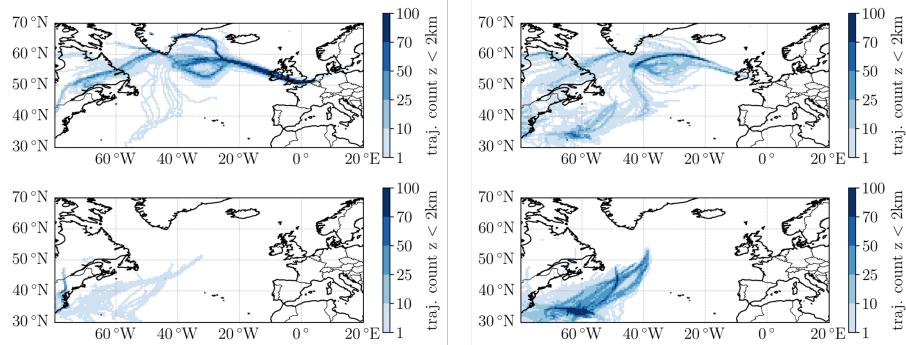

**Figure S11.** Spatial distribution of trajectory position below 2 km altitude for the airmasses sampled by the different filters of F05: a) filter 1, b) filter 2, c) filter 3, and d) filter 4.



## S7.2 Trajectories for F09

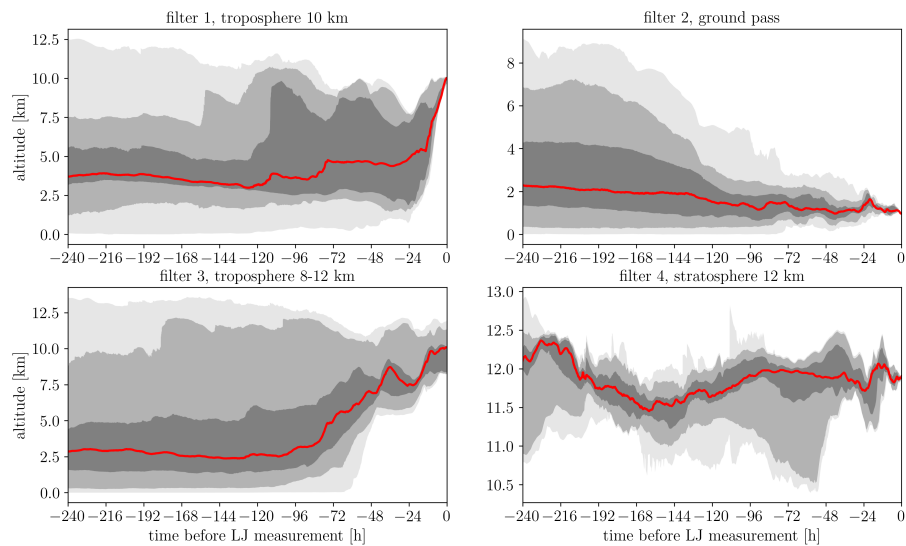

**Figure S12.** Evolution of parcel altitude in the 240 h prior to the Learjet observations of F09. The median altitude is shown by the red line, the interquartile range by the dark grey shading, the 5th–95th percentile range by the medium grey shading and the the minimum–maximum range by the light grey shading.

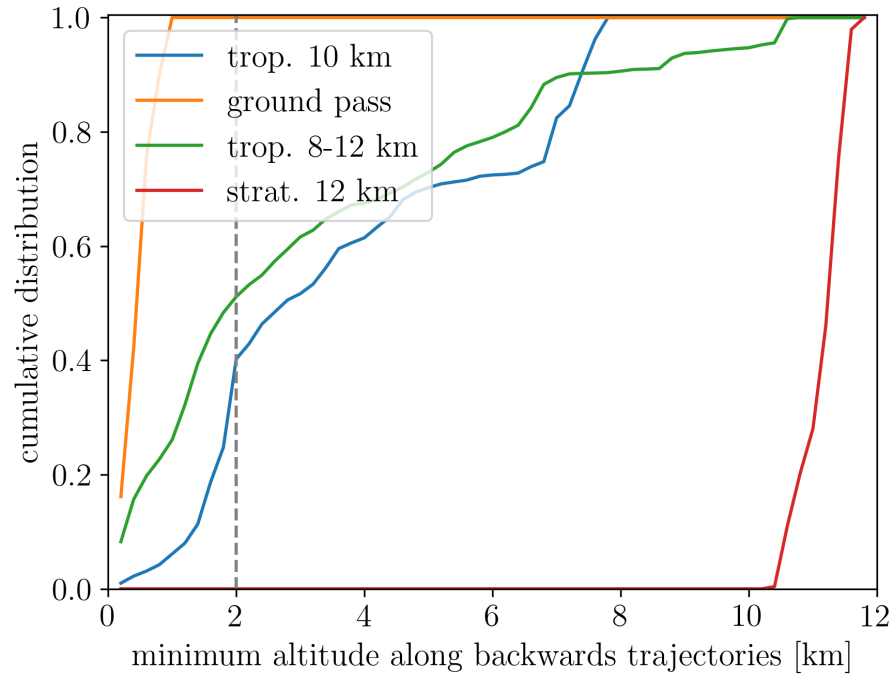

**Figure S13.** Fraction of trajectory that descend below a given altitude in the 240 h prior to the Learjet observations of F09. The different colors represent the different time ranges along the flight path sampled by the different filters as indicated in the legend.

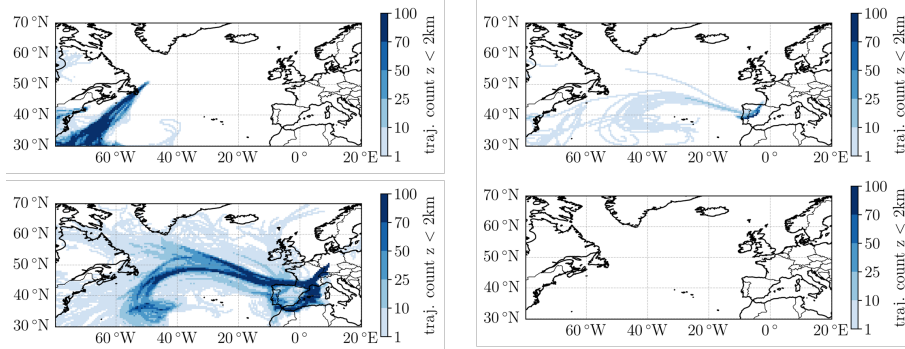

**Figure S14.** Spatial distribution of trajectory position below 2 km altitude for the airmasses sampled by the different filters of F09: a) filter 1, b) filter 2, c) filter 3, and d) filter 4.

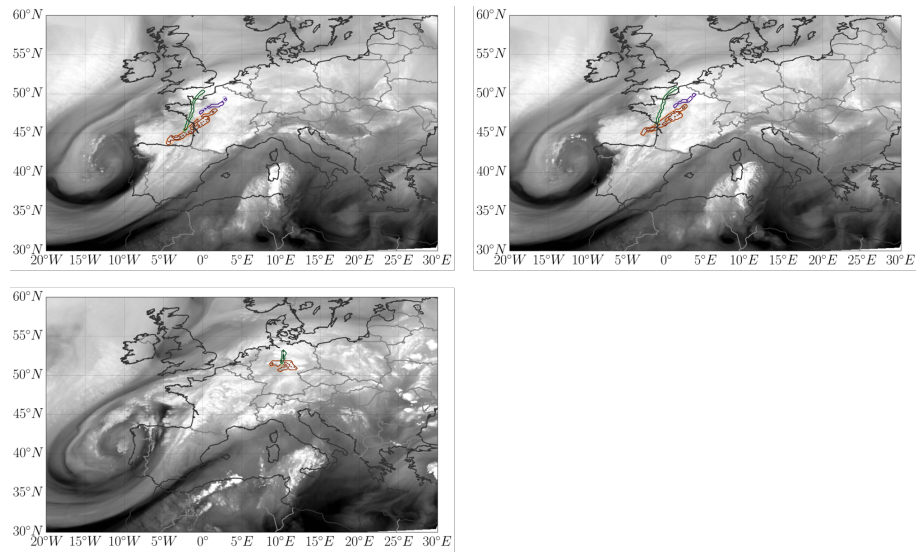

**Figure S15.** Co-location of trajectories of F09 with altitudes larger than 7 km and MSG WV 6.2  $\mu\text{m}$  channel Images. The positions of trajectories sampled by filter 1, 2, 3, and 4 are shown in purple, blue, orange, and green, respectively. Snapshots are shown at a) 6:57 UTC, b) 7:57 UTC and c) 14:57 UTC.

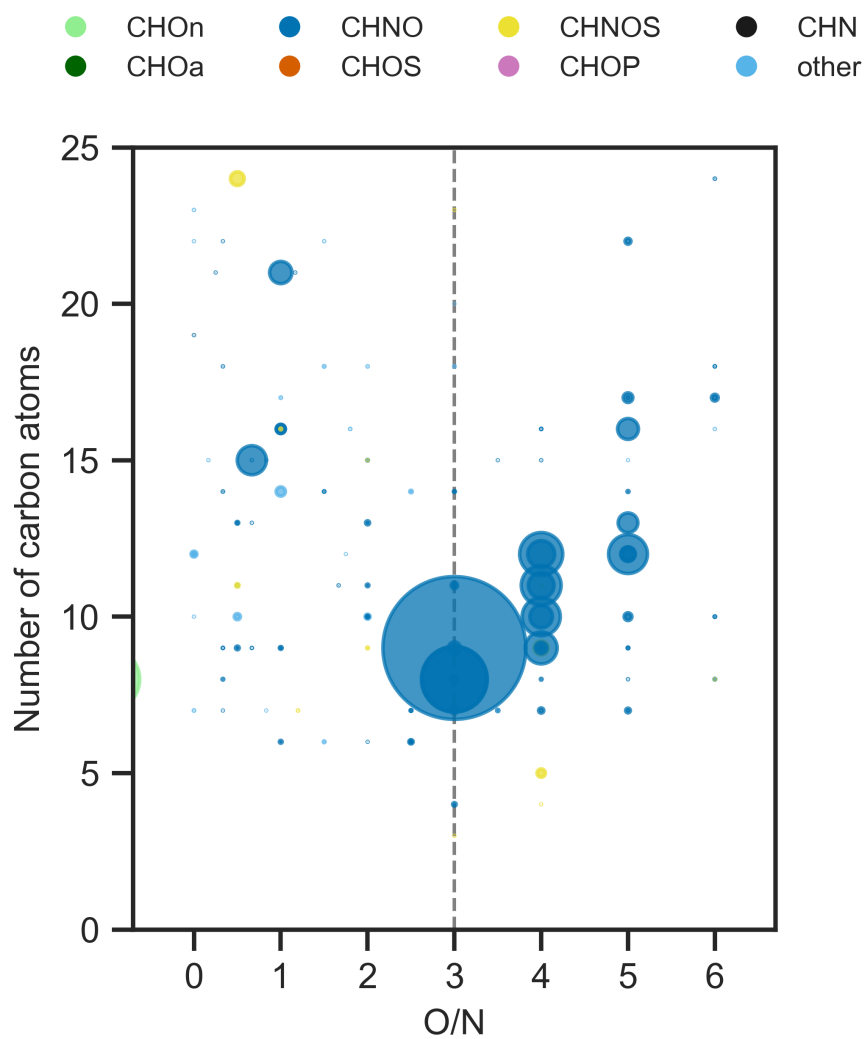

**Figure S16.** O/N ratio (x-axis) against the number of carbon atoms on the y-axis, for the stratospheric filter of F05. The circle diameter of each compound represents the relative intensity, and the circle colour the group that is assigned (CHOn, CHOa, CHNO, CHOS, CHNOS, CHOP, CHN and *other*). All compounds displayed were measured in HESI negative ionization mode.

## S9 Target analysis

### S9.1 Ratio for estimating the anthropogenic influence

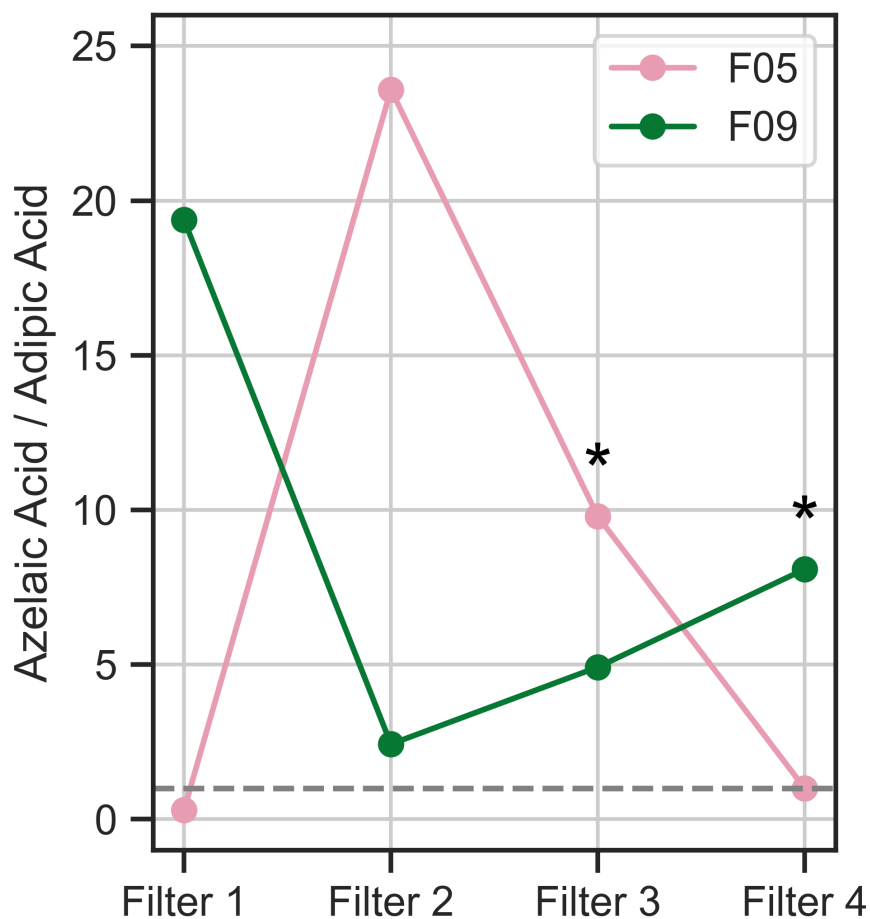

**Figure S17.** Displayed is the ratio of azelaic acid (C9) to adipic acid (C6) for each filter of F05 (rose) and F09 (green). The stratospheric filters are marked with a star (\*) and the horizontal dashed line marks an equal ratio between C9 to C6.

## S9.2 Isotopic fine structure and identification of TCPP

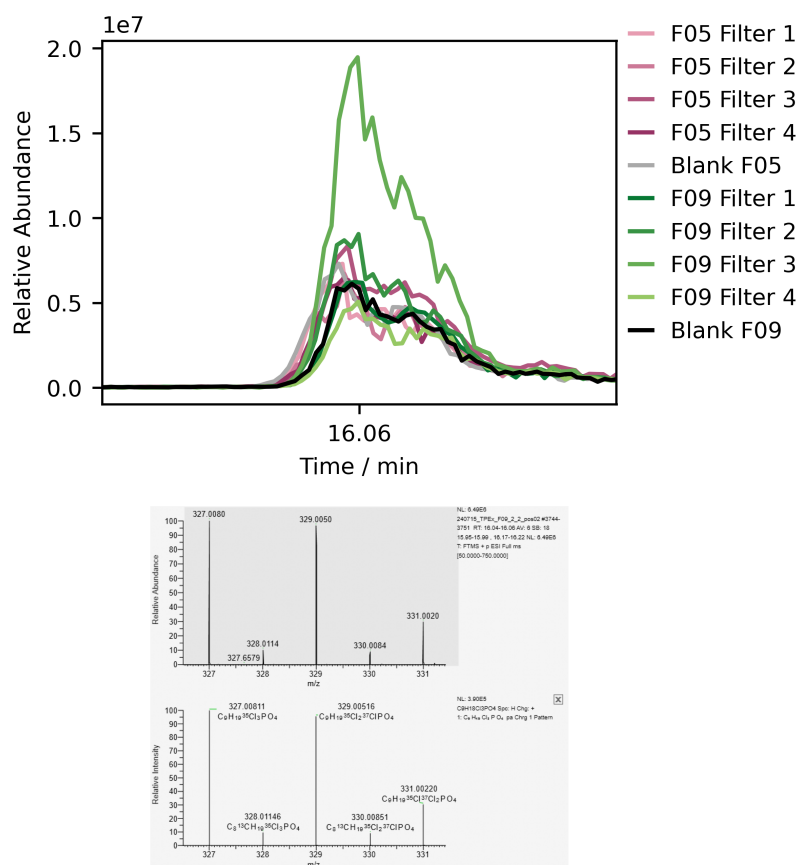

**Figure S18.** The upper plot shows the chromatograms for the mass trace of TCPP ( $m/z = 327.0081$ ) of the respective filters. The lower plot displays the ions measured at the respective retention time 16.06 min (upper one) and the isotopic simulation for  $C_9H_{18}Cl_3PO_4$  (lower one).
